# Supplementary material for: 180-day readmission risk model for older adults with acute myocardial infarction: the SILVER-AMI study
Source: PubMed Central journal article supplement — Open Heart. 2021 Jan 14;8(1):e001442. doi: 10.1136/openhrt-2020-001442 (PMC7813425; doi:10.1136/openhrt-2020-001442), 2021-01-14
Supplement: openhrt-2020-001442supp001.pdf [file openhrt-2020-001442supp001.pdf]

**SUPPLEMENTARY APPENDIX:**

| <b>eTable 1: Full list of variables considered for 180-day readmission risk model</b> |                                                                                                                            |
|---------------------------------------------------------------------------------------|----------------------------------------------------------------------------------------------------------------------------|
| <b>Variable</b>                                                                       | <b>Categories</b>                                                                                                          |
| Any Activity of Daily Living (ADL) domain impaired                                    | 1=Yes, 0=No                                                                                                                |
| Avoided health care services because of cost                                          | 1=Yes, 0=No                                                                                                                |
| Body mass index (BMI)                                                                 | 1=Low or Normal weight: BMI < 25,<br>2=Overweight: 25 <= BMI < 30,<br>3=Obese: BMI >= 30                                   |
| Calculated age                                                                        | Numerical                                                                                                                  |
| 2 or more episodes of severe chest pain (angina) 24 hours before going to hospital    | 1=Yes, 0=No                                                                                                                |
| Controlled Word Association Test (COWAT): Total S words                               | Numerical                                                                                                                  |
| ECG Changes                                                                           | 1=No ischemic ECG changes,<br>2=ST segment depression or T wave inversion in 2 contiguous leads,<br>3=ST segment elevation |
| Highest level of education                                                            | 1= ≤12 years<br>0= or less                                                                                                 |
| Finances at the end of the month                                                      | 1=Some money left over,<br>2=Just enough to make ends meet,<br>3=Not enough to make ends meet                              |
| Number of falls in past year                                                          | 1=Two or more<br>0=None or one                                                                                             |
| Respirations (first available)                                                        | Numerical                                                                                                                  |
| First diastolic blood pressure categories                                             | 1=<50,<br>2=50-59,<br>3=60-69,<br>4=70-79,<br>5=80-89,<br>6=90-99,<br>7=>=100                                              |
| First heart rate categories                                                           | 1=<50,<br>2=50-69,<br>3=70-79,<br>4=80-89,<br>5=90-99,<br>6=100-109,<br>7=110-129,<br>8=130-149,<br>9=>=150                |

|                                                                               |                                                                                                                   |
|-------------------------------------------------------------------------------|-------------------------------------------------------------------------------------------------------------------|
| First systolic blood pressure categories                                      | 1=<80,<br>2=80-99,<br>3=100-109,<br>4=110-119,<br>5=120-129,<br>6=130-139,<br>7=140-159,<br>8=160-179,<br>9=>=180 |
| Glomerular filtration rate (Initial)                                          | Numerical                                                                                                         |
| Weak grip strength                                                            | 1=Yes, 0=No                                                                                                       |
| Hearing impaired (how much does your hearing interfere with your activities?) | 1=not at all<br>2=a little<br>3=a moderate amount<br>4=a lot                                                      |
| In-hospital adverse event - Acute kidney injury*                              | 1=Yes, 0=No                                                                                                       |
| In hospital adverse event - Arrhythmia*                                       | 1=Yes, 0=No                                                                                                       |
| In hospital adverse event - Bleeding*                                         | 1=Yes, 0=No                                                                                                       |
| In hospital adverse event - Heart Failure*                                    | 1=Yes, 0=No                                                                                                       |
| In hospital adverse event - Hyperglycemia*                                    | 1=Yes, 0=No                                                                                                       |
| In-hospital LVEF categories                                                   | 1= >=50%,<br>2= 40-50%,<br>3= 30-40%,<br>4= <30%                                                                  |
| Hemoglobin initial value (first available)                                    | Numerical                                                                                                         |
| Killip Class                                                                  | 0=Killip I,<br>1=Killip II, III or IV                                                                             |
| Live alone                                                                    | 1=Yes, 0=No                                                                                                       |
| Length of stay (days)                                                         | Numerical                                                                                                         |
| Male                                                                          | 1=Yes, 0=No                                                                                                       |
| Marital status                                                                | 1= Married or living as<br>married / living with<br>partner,<br>2= Divorced / separated /<br>single / widowed     |
| SF-12 general health status                                                   | 1=Excellent<br>2=very good<br>3=good<br>4=fair/poor                                                               |
| Final reconciled AMI diagnosis                                                | 1= NSTEMI,<br>0= STEMI,                                                                                           |
| Able to walk 1/4 mile 1 month before going to hospital                        | 1=Yes, 0=No                                                                                                       |
| Non sinus rhythm (1st or 2nd ECG)                                             | 1=Yes, 0=No                                                                                                       |
| Race                                                                          | 1=non-white<br>0=white                                                                                            |
| Did not take prescribed medication because of the cost                        | 1=Yes, 0=No                                                                                                       |
| Time from symptom onset to presentation                                       | 1= ≥6 hours,<br>0= <6 hours                                                                                       |

|                                                               |                                                                                                 |
|---------------------------------------------------------------|-------------------------------------------------------------------------------------------------|
| Peak troponin to upper limit of normal (ULN) ratio            | Numerical                                                                                       |
| Depressive symptoms (PHQ positive screen)                     | 1=Yes, 0=No                                                                                     |
| Aspirin on day of or within 24 hrs of admission               | 1=Yes, 0=No                                                                                     |
| ACEI/ARB within 24 hrs of admission                           | 1=Yes, 0=No                                                                                     |
| Antiplatelet within 24 hrs of admission                       | 1=Yes, 0=No                                                                                     |
| Beta blocker within 24 hrs of admission                       | 1=Yes, 0=No                                                                                     |
| Statin within 24 hrs of admission                             | 1=Yes, 0=No                                                                                     |
| Prior history of arrhythmias                                  | 1=Yes, 0=No                                                                                     |
| Prior history of coronary artery disease                      | 1=Yes, 0=No                                                                                     |
| Prior history of cerebrovascular disease                      | 1=Yes, 0=No                                                                                     |
| Prior history of heart failure                                | 1=Yes, 0=No                                                                                     |
| Prior history of chronic obstructive pulmonary disease (COPD) | 1=Yes, 0=No                                                                                     |
| Prior history of diabetes mellitus (DM)                       | 1=Yes, 0=No                                                                                     |
| Prior history of hypertension                                 | 1=Yes, 0=No                                                                                     |
| Prior history of cancer                                       | 1=Yes, 0=No                                                                                     |
| Prior history of AMI                                          | 1=Yes, 0=No                                                                                     |
| Prior history of peripheral arterial disease (PAD)            | 1=Yes, 0=No                                                                                     |
| Prior history of peptic ulcer disease                         | 1=Yes, 0=No                                                                                     |
| Prior cardiac revascularization                               | 1=Yes, 0=No                                                                                     |
| Prior history of sleep apnea                                  | 1=Yes, 0=No                                                                                     |
| Prior history of valve disease                                | 1=Yes, 0=No                                                                                     |
| Current or ever smoker                                        | 1=Yes, 0=No                                                                                     |
| Social support: someone to help with chores                   | 0=Most of the time/all of the time,<br>1=None of the time/a little of the time/some of the time |
| Social support: someone to confide in                         | 0=Most of the time/all of the time,<br>1=None of the time/a little of the time/some of the time |
| Social support: someone to love and make you feel wanted      | 0=Most of the time/all of the time,<br>1=None of the time/a little of the time/some of the time |
| Social support: someone to relax with                         | 0=Most of the time/all of the time,<br>1=None of the time/a little of the time/some of the time |
| Social support: someone to turn for suggestions               | 0=Most of the time/all of the time,<br>1=None of the time/a little of the time/some of the time |
| Telephone Interview for Cognitive Status (TICS) total score   | Numerical                                                                                       |

|                                                                                                                                                                                                                                                                                                                                                                                                                                                                                                                                                                                                                                  |                                                                                                                                            |
|----------------------------------------------------------------------------------------------------------------------------------------------------------------------------------------------------------------------------------------------------------------------------------------------------------------------------------------------------------------------------------------------------------------------------------------------------------------------------------------------------------------------------------------------------------------------------------------------------------------------------------|--------------------------------------------------------------------------------------------------------------------------------------------|
| Timed Up and Go (functional mobility)                                                                                                                                                                                                                                                                                                                                                                                                                                                                                                                                                                                            | 1=Completed in <= 15 seconds,<br>2=Completed in > 15 and <= 25 seconds,<br>3=Completed in > 25 seconds,<br>4=Unable to complete assessment |
| Cachexia (unintentional weight loss > 10 lbs. in past year)                                                                                                                                                                                                                                                                                                                                                                                                                                                                                                                                                                      | 1=Yes, 0=No                                                                                                                                |
| Visual impairment (vision at current time)                                                                                                                                                                                                                                                                                                                                                                                                                                                                                                                                                                                       | 1=excellent<br>2=good<br>3=fair<br>4=poor/very poor/completely blind                                                                       |
| White blood cell highest value                                                                                                                                                                                                                                                                                                                                                                                                                                                                                                                                                                                                   | Numerical                                                                                                                                  |
| <p>*Definitions for in-hospital complications:</p> <p><u>Acute kidney injury</u>: increase in serum creatinine of <math>\geq 0.3</math> mg/dL from baseline or <math>\geq 1.5</math> times baseline.</p> <p><u>Arrhythmia</u>: new-onset atrial fibrillation or ventricular tachycardia.</p> <p><u>Bleeding</u>: any intracranial bleed, hemoglobin drop <math>&gt; 3g/dL</math>, blood transfusion, or bleeding requiring intervention.</p> <p><u>Heart failure</u>: physician-adjudicated decompensated heart failure, not present on admission.</p> <p><u>Hyperglycemia</u>: any blood sugar <math>&gt; 250</math> mg/dL.</p> |                                                                                                                                            |

**eTable 2: Definition of functional impairments**

| <b>Functional impairment</b>                | <b>Definition</b>                                                                                                                                                                                                                                                                                                                                    | <b>Reference</b> |
|---------------------------------------------|------------------------------------------------------------------------------------------------------------------------------------------------------------------------------------------------------------------------------------------------------------------------------------------------------------------------------------------------------|------------------|
| General cognitive impairment                | Score on Telephone Interview for Cognitive Status (TICS) of 23-26 (mild) or $\leq 22$ (moderate/severe).                                                                                                                                                                                                                                             | <sup>13</sup>    |
| Verbal fluency                              | Controlled Word Association TEST (COWAT) (analyzed continuously; lower score indicates worse function).                                                                                                                                                                                                                                              | <sup>14</sup>    |
| Vision Impairment                           | Derived from Visual Functioning Questionnaire (VFQ-25) items and defined as:<br><ul style="list-style-type: none"> <li>• "At the present time, would you say your eyesight using both eyes is excellent, good, fair, poor, or very poor or are you completely blind?" with responses of "fair," "poor," "very poor" or "completely blind"</li> </ul> | <sup>15</sup>    |
| Hearing Impairment                          | Global question on dysfunction imposed by hearing impairment: , "How much does your hearing interfere with your activities?" with responses of "not at all," "a little," "a moderate amount," and "a lot".                                                                                                                                           | <sup>16</sup>    |
| Unintentional weight loss (cachexia)        | Loss of >10 pounds in year prior to baseline interview.                                                                                                                                                                                                                                                                                              |                  |
| Activities of daily living (ADL) impairment | Self-reported impairment (needing partial help or completely dependent on others) in any of the following essential activities: (1) bathing; (2) dressing; (3) getting in and out of a chair (transferring); (4) ambulating.                                                                                                                         | <sup>17</sup>    |
| Depressive symptoms                         | Score on Patient Health Questionnaire-8 (PHQ-8) $\geq 10$ .                                                                                                                                                                                                                                                                                          | <sup>18</sup>    |
| Grip strength                               | Based on highest measurement (of 3 attempts) using handheld dynamometer (B&L Engineering, Santa Ana, CA) with dominant hand. Sex-adjusted cutoffs for abnormal (weak) upper extremity strength: : Abnormal if <28.5 kg (men), <18.5 kg (women).                                                                                                      | <sup>19</sup>    |
| Functional mobility                         | Based on Timed Up and Go test (TUG). Mobility divided into four categories: (1) completed TUG in $\leq 15$ seconds; (2) completed TUG in >15 to $\leq 25$ seconds; (3) completed TUG in >25 seconds; (4) unable to complete TUG. "Impaired mobility" was defined as TUG >15 seconds or unable to complete TUG (categories 2,3,4).                    | <sup>20</sup>    |
| Fall history                                | Number of falls within past year (0 vs. 1 vs. $\geq 2$ ).                                                                                                                                                                                                                                                                                            |                  |

**eTable 3: Full regression results for 180-day readmission risk model**

|                                                                                                                                                                                                                                                                                                                                                                                                                                                  | <b>Beta</b> | <b>Standardized Beta</b> | <b>OR (95% CI)</b> | <b>P value</b> |
|--------------------------------------------------------------------------------------------------------------------------------------------------------------------------------------------------------------------------------------------------------------------------------------------------------------------------------------------------------------------------------------------------------------------------------------------------|-------------|--------------------------|--------------------|----------------|
| History of COPD                                                                                                                                                                                                                                                                                                                                                                                                                                  | 0.430       | 2.98                     | 1.54 (1.16-2.04)   | 0.003          |
| ECG changes (per level*)                                                                                                                                                                                                                                                                                                                                                                                                                         | 0.144       | 2.47                     | 1.15 (1.03-1.19)   | 0.014          |
| First diastolic BP (mmHg, per 10 point increase)                                                                                                                                                                                                                                                                                                                                                                                                 | -0.079      | 3.04                     | 0.92 (0.88-0.97)   | 0.002          |
| First heart rate (bpm, per level†)                                                                                                                                                                                                                                                                                                                                                                                                               | 0.055       | 2.08                     | 1.06 (1.00-1.11)   | 0.038          |
| Initial hemoglobin (per g/dL)                                                                                                                                                                                                                                                                                                                                                                                                                    | -0.106      | 4.22                     | 0.90 (0.86-0.94)   | <.001          |
| Ejection fraction (per level‡)                                                                                                                                                                                                                                                                                                                                                                                                                   | 0.110       | 2.30                     | 1.12 (1.02-1.23)   | 0.021          |
| Length of stay (per day)                                                                                                                                                                                                                                                                                                                                                                                                                         | 0.019       | 2.33                     | 1.02 (1.00-1.04)   | 0.020          |
| History of heart failure                                                                                                                                                                                                                                                                                                                                                                                                                         | 0.613       | 5.10                     | 1.85 (1.46-2.34)   | <.001          |
| Short form 12 general health status (per level§)                                                                                                                                                                                                                                                                                                                                                                                                 | 0.159       | 3.30                     | 1.17 (1.07-1.29)   | 0.001          |
| Functional mobility (per level¶)                                                                                                                                                                                                                                                                                                                                                                                                                 | 0.125       | 2.86                     | 1.13 (1.04-1.23)   | 0.004          |
| * Three categories: no ischemic ECG changes (reference), ST segment depression or T wave inversion in 2 contiguous leads, ST segment elevation<br>† <50 bpm (reference), 50-69,70-79, 80-89, 90-99, 100-109, 110-129, 130-149, ≥150<br>‡ ≥50% (reference), 40-50%, 30-40%, <30%<br>§ Excellent/very good (reference), good, fair, poor<br>¶ Completed Timed Up and Go in ≤15 seconds (reference), >15-25 seconds, >25seconds, unable to complete |             |                          |                    |                |

| <b>eTable 4: Sensitivity Analyses:<br/>Regression results for 180-day readmission risk model under different assumptions for readmission among early decedents</b>                                                                                                                                                                                                                                                                                                                                                                                                                                                                                                                                                                                                                                                                                                                                                                    |                                         |                                      |                                      |                                      |
|---------------------------------------------------------------------------------------------------------------------------------------------------------------------------------------------------------------------------------------------------------------------------------------------------------------------------------------------------------------------------------------------------------------------------------------------------------------------------------------------------------------------------------------------------------------------------------------------------------------------------------------------------------------------------------------------------------------------------------------------------------------------------------------------------------------------------------------------------------------------------------------------------------------------------------------|-----------------------------------------|--------------------------------------|--------------------------------------|--------------------------------------|
|                                                                                                                                                                                                                                                                                                                                                                                                                                                                                                                                                                                                                                                                                                                                                                                                                                                                                                                                       | <b>Original results<br/>OR (95% CI)</b> | <b>Alternative 1<br/>OR (95% CI)</b> | <b>Alternative 2<br/>OR (95% CI)</b> | <b>Alternative 3<br/>OR (95% CI)</b> |
| History of COPD                                                                                                                                                                                                                                                                                                                                                                                                                                                                                                                                                                                                                                                                                                                                                                                                                                                                                                                       | 1.54 (1.16-2.04)                        | 1.46 (1.12-1.91)                     | 1.54 (1.16-2.04)                     | 1.51 (1.15-2.00)                     |
| ECG changes (per level*)                                                                                                                                                                                                                                                                                                                                                                                                                                                                                                                                                                                                                                                                                                                                                                                                                                                                                                              | 1.15 (1.03-1.19)                        | 1.15 (1.03-1.29)                     | 1.16 (1.03-1.30)                     | 1.16 (1.03-1.30)                     |
| First diastolic BP (mmHg, per 10 point increase)                                                                                                                                                                                                                                                                                                                                                                                                                                                                                                                                                                                                                                                                                                                                                                                                                                                                                      | 0.92 (0.88-0.97)                        | 0.91 (0.87-0.96)                     | 0.92 (0.88-0.97)                     | 0.92 (0.87-0.97)                     |
| First heart rate (bpm, per level†)                                                                                                                                                                                                                                                                                                                                                                                                                                                                                                                                                                                                                                                                                                                                                                                                                                                                                                    | 1.06 (1.00-1.11)                        | 1.07 (1.02-1.13)                     | 1.06 (1.00-1.11)                     | 1.06 (1.01-1.12)                     |
| Initial hemoglobin (per g/dL)                                                                                                                                                                                                                                                                                                                                                                                                                                                                                                                                                                                                                                                                                                                                                                                                                                                                                                         | 0.90 (0.86-0.94)                        | 0.88 (0.83-0.92)                     | 0.90 (0.86-0.94)                     | 0.88 (0.84-0.93)                     |
| Ejection fraction (per level‡)                                                                                                                                                                                                                                                                                                                                                                                                                                                                                                                                                                                                                                                                                                                                                                                                                                                                                                        | 1.12 (1.02-1.23)                        | 1.13 (1.03-1.25)                     | 1.12 (1.02-1.23)                     | 1.13 (1.02-1.25)                     |
| Length of stay (per day)                                                                                                                                                                                                                                                                                                                                                                                                                                                                                                                                                                                                                                                                                                                                                                                                                                                                                                              | 1.02 (1.00-1.04)                        | 1.02 (1.01-1.04)                     | 1.02 (1.00-1.04)                     | 1.02 (1.01-1.04)                     |
| History of heart failure                                                                                                                                                                                                                                                                                                                                                                                                                                                                                                                                                                                                                                                                                                                                                                                                                                                                                                              | 1.85 (1.46-2.34)                        | 1.93 (1.53-2.42)                     | 1.86 (1.46-2.36)                     | 1.93 (1.53-2.43)                     |
| Short form 12 general health status (per level§)                                                                                                                                                                                                                                                                                                                                                                                                                                                                                                                                                                                                                                                                                                                                                                                                                                                                                      | 1.17 (1.07-1.29)                        | 1.23 (1.13-1.35)                     | 1.17 (1.06-1.28)                     | 1.22 (1.11-1.34)                     |
| Functional mobility (per level¶)                                                                                                                                                                                                                                                                                                                                                                                                                                                                                                                                                                                                                                                                                                                                                                                                                                                                                                      | 1.13 (1.04-1.23)                        | 1.18 (1.08-1.29)                     | 1.12 (1.03-1.22)                     | 1.16 (1.06-1.26)                     |
| <p>Alternative scenarios to account for the competing risk of death among early decedents (62 died before readmission).<br/>           Alternatives with the following assumptions for these participants:<br/>           Alternative 1: Assume all early decedents were readmitted<br/>           Alternative 2: Assume all early decedents were not readmitted<br/>           Alternative 3: Assume readmissions of early decedents were missing at random</p> <p>* Three categories: no ischemic ECG changes (reference), ST segment depression or T wave inversion in 2 contiguous leads, ST segment elevation<br/>           † &lt;50 bpm, 50-69, 70-79, 80-89, 90-99, 100-109, 110-129, 130-149, ≥150<br/>           ‡ ≥50%, 40-50%, 30-40%, &lt;30%<br/>           § Excellent/very good, good, fair, poor<br/>           ¶ Completed Timed Up and Go in ≤15 seconds, &gt;15-25 seconds, &gt;25seconds, unable to complete</p> |                                         |                                      |                                      |                                      |
